# Supplementary material for: Associations of fat‐soluble micronutrients and redox biomarkers with frailty status in the FRAILOMIC initiative
Source: PubMed Central journal article supplement — J Cachexia Sarcopenia Muscle. 2019 Aug 21;10(6):1339–46. doi: 10.1002/jcsm.12479 (PMC6903435; doi:10.1002/jcsm.12479), 2019-08-21
Supplement: JCSM-10-1339-s002.pdf [file JCSM-10-1339-s002.pdf]

**Table S2 Study characteristics by individual FRAILOMIC cohorts**

|                              | <b>3-C</b>               | <b>AMI</b>               | <b>TSHA</b>              | <b>InC</b>                 | <b><i>p</i></b>               |
|------------------------------|--------------------------|--------------------------|--------------------------|----------------------------|-------------------------------|
| <b>N, % (n)</b>              | 469                      | 289                      | 414                      | 278                        |                               |
| <b>Females, % (n)</b>        | 62.3 (292)               | 37.7 (109)               | 59.7 (247)               | 58.6 (163)                 | <b>&lt; 0.001<sup>#</sup></b> |
| <b>Age, years</b>            | 82.1 ± 4.7 <sup>a</sup>  | 75.5 ± 6.4 <sup>b</sup>  | 75.1 ± 5.7 <sup>b</sup>  | 75.5 ± 6.9 <sup>b</sup>    | <b>&lt; 0.001</b>             |
| <b>Weight, kg</b>            | 67.2 ± 13.5 <sup>a</sup> | 76.0 ± 14.8 <sup>b</sup> | 71.5 ± 12.2 <sup>c</sup> | 69.2 ± 13.0 <sup>a,c</sup> | <b>&lt; 0.001</b>             |
| <b>Height, cm</b>            | 161.2 ± 9.5 <sup>a</sup> | 165.0 ± 8.2 <sup>b</sup> | 156.8 ± 9.2 <sup>c</sup> | 157.3 ± 9.3 <sup>c</sup>   | <b>&lt; 0.001</b>             |
| <b>BMI, kg/m<sup>2</sup></b> | 25.8 ± 4.1 <sup>a</sup>  | 27.8 ± 4.5 <sup>b</sup>  | 29.1 ± 4.8 <sup>c</sup>  | 27.9 ± 4.4 <sup>b</sup>    | <b>&lt; 0.001</b>             |
| <b>Smoker, % (n)</b>         | 4.7 (22)                 | 5.2 (15)                 | 8.8 (36)                 | 0.0 (0)                    | <b>&lt; 0.001<sup>#</sup></b> |
| <b>MMSE, points</b>          | 27.9 ± 2.1 <sup>a</sup>  | 25.6 ± 3.5 <sup>b</sup>  | 23.1 ± 5.2 <sup>c</sup>  | 24.9 ± 3.4 <sup>b</sup>    | <b>&lt; 0.001</b>             |

All results reported mean (standard deviation) or % (n). BMI, body mass index; MMSE, Mini-Mental State Examination. Superscript letters indicate statistical significant differences between frailty groups by unadjusted GLM. <sup>#</sup> Differences between frailty groups determined by Pearson's chi-squared test. *P* < 0.05.

### **Associations of vitamins D<sub>3</sub>, A, E, carotenoids and biomarkers of oxidative stress with frailty status in the FRAILOMIC initiative**

Journal of Cachexia, Sarcopenia and Muscle

Bastian Kochlik, Wolfgang Stuetz, Karine Pérès, Sophie Pilleron, Catherine Féart, Francisco José García García, Stefania Bandinelli, David Gomez-Cabrero, Leocadio Rodriguez-Manas, Tilman Grune, Daniela Weber<sup>1,2,#,\*</sup>

<sup>#</sup>Corresponding author: Daniela Weber, PhD; <sup>1</sup> Department of Molecular Toxicology, German Institute of Human Nutrition Potsdam-Rehbruecke (DIfE), Nuthetal, Germany; <sup>2</sup> NutriAct-Competence Cluster Nutrition Research Berlin-Potsdam, Nuthetal, Germany; \* on behalf of the FRAILOMIC Initiative; Email: Daniela.Weber@dife.de; Phone: +49 (0)33200-88-2358; Fax: +49 (0)33200-88-2407.
