# Supplementary material for: Associations of fat‐soluble micronutrients and redox biomarkers with frailty status in the FRAILOMIC initiative
Source: PubMed Central journal article supplement — J Cachexia Sarcopenia Muscle. 2019 Aug 21;10(6):1339–46. doi: 10.1002/jcsm.12479 (PMC6903435; doi:10.1002/jcsm.12479), 2019-08-21
Supplement: JCSM-10-1339-s003.pdf [file JCSM-10-1339-s003.pdf]

**Table S3 Plasma concentrations of biomarkers by the FRAILOMIC cohorts**

| <b>Biomarker</b>                      | <b>3-C</b>                    | <b>AMI</b>                      | <b>TSHA</b>                   | <b>InC</b>                      | <b><i>p</i></b> |
|---------------------------------------|-------------------------------|---------------------------------|-------------------------------|---------------------------------|-----------------|
| <b>Vitamin D<sub>3</sub></b> , nmol/L | 41.6 (39.6- 3.8) <sup>a</sup> | 37.0 (34.7-39.5) <sup>b</sup>   | 47.1 (44.6-49.7) <sup>c</sup> | 41.0 (38.4-43.8) <sup>a,b</sup> | < <b>0.001</b>  |
| <b>Retinol</b> , μmol/L               | 2.04 (1.99-2.09) <sup>a</sup> | 2.01 (1.95-2.07) <sup>a</sup>   | 1.69 (1.65-1.74) <sup>b</sup> | 1.76 (1.70-1.82) <sup>a</sup>   | < <b>0.001</b>  |
| <b>α-Tocopherol</b> , μmol/L          | 30.8 (30.1-31.5) <sup>a</sup> | 25.9 (25.0-26.8) <sup>b</sup>   | 31.3 (30.6-32.1) <sup>a</sup> | 27.9 (27.0-28.9) <sup>c</sup>   | < <b>0.001</b>  |
| <b>γ-Tocopherol</b> , μmol/L          | 1.34 (1.29-1.40) <sup>a</sup> | 1.26 (1.20-1.34) <sup>a,b</sup> | 1.00 (0.96-1.05) <sup>c</sup> | 1.17 (1.11-1.24) <sup>b</sup>   | < <b>0.001</b>  |
| <b>α-Carotene</b> , μmol/L            | 0.22 (0.20-0.23) <sup>a</sup> | 0.23 (0.21-0.25) <sup>a</sup>   | 0.08 (0.07-0.08) <sup>b</sup> | 0.05 (0.04-0.05) <sup>c</sup>   | < <b>0.001</b>  |
| <b>β-Carotene</b> , μmol/L            | 0.62 (0.58-0.66) <sup>a</sup> | 0.59 (0.54-0.64) <sup>a</sup>   | 0.34 (0.32-0.37) <sup>b</sup> | 0.19 (0.18-0.21) <sup>c</sup>   | < <b>0.001</b>  |
| <b>Lycopene</b> , μmol/L              | 0.34 (0.32-0.36) <sup>a</sup> | 0.40 (0.37-0.44) <sup>b</sup>   | 0.55 (0.51-0.59) <sup>c</sup> | 0.18 (0.16-0.19) <sup>d</sup>   | < <b>0.001</b>  |
| <b>Lutein/Zeaxanthin</b> , μmol/L     | 0.35 (0.34-0.37) <sup>a</sup> | 0.41 (0.39-0.43) <sup>b</sup>   | 0.29 (0.28-0.31) <sup>c</sup> | 0.27 (0.25-0.29) <sup>c</sup>   | < <b>0.001</b>  |
| <b>β-Cryptoxanthin</b> , μmol/L       | 0.23 (0.22-0.25) <sup>a</sup> | 0.15 (0.14-0.17) <sup>b</sup>   | 0.29 (0.27-0.32) <sup>c</sup> | 0.12 (0.11-0.13) <sup>d</sup>   | < <b>0.001</b>  |
| <b>Protein Carbonyls</b> , nmol/mg    | 0.41 (0.39-0.42) <sup>a</sup> | 0.23 (0.22-0.24) <sup>b</sup>   | 0.27 (0.26-0.28) <sup>c</sup> | 0.29 (0.28-0.31) <sup>c</sup>   | < <b>0.001</b>  |
| <b>3-Nitrotyrosine</b> , pmol/mg      | 4.85 (4.54-5.17) <sup>a</sup> | 8.82 (8.13-9.57) <sup>b</sup>   | 7.67 (7.16-8.21) <sup>b</sup> | 10.4 (9.52-11.3) <sup>c</sup>   | < <b>0.001</b>  |

All results reported geometric means (95% confidence interval). Superscript letters indicate statistical significant differences between cohorts by unadjusted GLM; n=1448, except VD<sub>3</sub>: n=1450, 3-NT: n=1441 and PrCarb: n=1455; *P* < 0.05.

### **Associations of vitamins D<sub>3</sub>, A, E, carotenoids and biomarkers of oxidative stress with frailty status in the FRAILOMIC initiative**

Journal of Cachexia, Sarcopenia and Muscle

Bastian Kochlik, Wolfgang Stuetz, Karine Pérès, Sophie Pilleron, Catherine Féart, Francisco José García García, Stefania Bandinelli, David Gomez-Cabrero, Leocadio Rodriguez-Manas, Tilman Grune, Daniela Weber<sup>1,2,#,\*</sup>

<sup>#</sup>Corresponding author: Daniela Weber, PhD; <sup>1</sup> Department of Molecular Toxicology, German Institute of Human Nutrition Potsdam-Rehbruecke (DIfE), Nuthetal, Germany; <sup>2</sup> NutriAct-Competence Cluster Nutrition Research Berlin-Potsdam, Nuthetal, Germany; \* on behalf of the FRAILOMIC Initiative; Email: Daniela.Weber@dife.de; Phone: +49 (0)33200-88-2358; Fax: +49 (0)33200-88-2407.
